# Supplementary material for: Dual Effect of Raptor on Neonatal β-Cell Proliferation and Identity Maintenance
Source: Oxford University Press journal article supplement (doi:10.2337/db19-0166), 2019-07-25
Supplement: db190166supplementarydata2.xlsx [file db190166supplementarydata2.xlsx]

## Sheet: Sheet1
G1/S phase genes		wt1-FPKM	wt2-FPKM	wt3-FPKM	ko1-FPKM	ko2-FPKM	ko3-FPKM	ko4-FPKM	p-value
ENSMUSG00000017146	Brca1	2.97041	2.03181	1.92567	1.39884	1.21892	1.02201	1.18784	0.0130185
ENSMUSG00000000028	Cdc45	7.10285	6.56316	6.05631	4.35829	3.51762	4.17439	4.24814	0.000710264
ENSMUSG00000017499	Cdc6	5.33979	4.6293	2.66119	1.72085	1.29876	1.44186	1.84085	0.0121384
ENSMUSG00000021714	Cenpk	3.51142	3.90081	2.68793	1.71722	2.02154	2.26084	2.44774	0.0162383
ENSMUSG00000068101	Cenpm	4.31335	6.93859	4.42648	2.58128	1.4484	2.85596	2.02906	0.0137429
ENSMUSG00000002835	Chaf1a	5.10695	5.98569	4.15249	2.79042	2.53632	2.59762	2.27266	0.00271903
ENSMUSG00000022945	Chaf1b	6.96204	7.62398	5.57733	3.24932	3.78477	3.43104	3.26956	0.00152829
ENSMUSG00000019214	Chtf18	4.07596	3.77508	2.87587	1.60348	2.00532	2.2749	2.67051	0.0159666
ENSMUSG00000042489	Clspn	4.5188	3.63427	3.24149	1.82015	1.06721	1.58667	2.15396	0.00361904
ENSMUSG00000002297	Dbf4	6.97884	7.19984	4.44724	2.3462	1.59711	2.41619	2.85093	0.00455295
ENSMUSG00000029366	Dck	13.3396	11.4924	8.87952	7.99017	7.69154	6.83935	8.67656	0.0325543
ENSMUSG00000036875	Dna2	4.54176	3.75195	2.69508	1.48118	2.03588	1.43417	1.63344	0.00818641
ENSMUSG00000004099	Dnmt1	14.9826	15.7408	14.0729	10.0039	9.74538	8.85978	10.1148	0.000171337
ENSMUSG00000037474	Dtl	6.10803	4.25173	3.72085	2.0384	1.88809	2.55768	3.14057	0.021381
ENSMUSG00000020185	E2f7	2.60354	1.72156	2.20157	1.27883	0.855889	0.923565	1.21065	0.00641635
ENSMUSG00000046179	E2f8	4.78259	4.69353	2.97123	1.49274	1.05821	1.29423	1.82296	0.00357348
ENSMUSG00000031527	Eri1	7.47642	5.69107	6.5016	5.02706	4.85701	4.30728	4.61376	0.0108618
ENSMUSG00000039748	Exo1	2.34024	2.40476	2.26757	0.578507	0.684836	0.940191	1.8272	0.0109054
ENSMUSG00000029687	Ezh2	10.9151	14.1029	9.72192	7.58282	6.21189	7.54472	7.03482	0.0116882
ENSMUSG00000024691	Fam111a	11.7451	13.8657	5.78793	3.45018	4.30985	3.66436	6.50685	0.0409005
ENSMUSG00000032815	Fanca	4.71727	6.24184	3.69707	1.4574	0.912612	2.07906	1.73069	0.00453213
ENSMUSG00000051235	Gen1	2.38124	1.48831	1.74718	0.719637	0.754925	0.424287	0.302011	0.00368932
ENSMUSG00000031821	Gins2	10.1002	12.1104	10.4922	10.0342	6.27601	5.33724	5.30643	0.0328317
ENSMUSG00000031669	Gins3	4.19569	3.30145	3.37878	2.16767	2.06589	2.08141	2.49658	0.00313196
ENSMUSG00000025001	Hells	5.97528	4.34743	4.23328	2.34086	2.66744	2.24511	3.31659	0.010228
ENSMUSG00000026669	Mcm10	3.25449	3.23619	2.09732	1.53692	0.926252	2.02839	1.87437	0.0320103
ENSMUSG00000002870	Mcm2	17.6842	18.853	15.5232	12.6068	12.3765	11.063	11.6885	0.00195489
ENSMUSG00000041859	Mcm3	18.5031	19.2838	11.6637	10.0841	9.55142	9.2551	9.67591	0.0200711
ENSMUSG00000005410	Mcm5	17.7459	20.5462	12.3132	9.96343	8.88833	9.51576	10.9314	0.0197116
ENSMUSG00000026355	Mcm6	22.0538	21.4442	17.5427	11.5973	13.9576	11.8915	15.4795	0.0067741
ENSMUSG00000017861	Mybl2	5.48937	5.56417	1.71259	1.35286	1.37648	1.1398	1.79756	0.0461134
ENSMUSG00000032939	Nup93	24.6969	22.1457	22.7863	8.48415	9.1096	9.99448	8.42523	8.7677e-06
ENSMUSG00000072980	Oip5	3.86523	3.27786	3.16215	1.9785	2.03819	2.37682	2.82632	0.012014
ENSMUSG00000026274	Pask	2.58066	2.89261	2.15354	1.67596	1.43973	1.63615	1.35022	0.00395337
ENSMUSG00000027342	Pcna	65.9966	76.6687	55.7409	45.6794	41.6173	49.4917	52.7571	0.0231601
ENSMUSG00000025395	Prim1	13.4057	14.7211	10.513	8.67514	9.08844	9.75425	9.88109	0.0232028
ENSMUSG00000030254	Rad18	4.06803	3.09044	2.86329	2.45197	2.28189	2.02303	2.06394	0.0186466
ENSMUSG00000027323	Rad51	4.78157	6.19602	4.01597	3.1519	1.82234	2.9187	2.9737	0.0164162
ENSMUSG00000030346	Rad51ap1	6.50424	6.30224	4.51227	3.83639	2.30552	3.54516	3.58969	0.0143854
ENSMUSG00000078773	Rad54b	3.62968	3.38913	3.04224	1.93538	1.42809	2.00579	1.25444	0.00130304
ENSMUSG00000028702	Rad54l	3.48873	2.84001	1.97846	1.43299	1.29826	0.931152	1.91569	0.0257372
ENSMUSG00000028896	Rcc1	8.81223	12.1582	6.63112	5.84024	3.88237	5.56081	4.36628	0.0319762
ENSMUSG00000033970	Rfc3	11.4153	11.8285	9.8033	7.62188	8.36948	9.91119	9.61471	0.0475911
ENSMUSG00000029363	Rfc5	13.3379	17.4475	15.2615	10.7707	10.6376	11.8155	9.12557	0.0103081
ENSMUSG00000030978	Rrm1	24.9728	26.3726	14.7589	13.5241	13.2136	14.2219	14.5172	0.0455129
ENSMUSG00000028718	Stil	1.92599	1.59916	1.55711	0.741083	0.506193	0.614136	0.446954	0.000281417
ENSMUSG00000050410	Tcf19	15.7748	22.8189	16.3048	12.4174	8.10964	12.1183	10.6426	0.0200572
ENSMUSG00000032555	Topbp1	14.1092	13.3403	11.3177	7.7243	9.23277	8.38784	8.87248	0.00274827
ENSMUSG00000035198	Tubg1	17.9168	21.5878	19.4995	16.3702	12.8132	15.0057	13.9277	0.00968902
ENSMUSG00000001228	Uhrf1	11.939	17.1578	6.97073	5.21869	3.90941	4.00717	5.29417	0.0313191
ENSMUSG00000021115	Vrk1	14.4752	12.3271	13.2614	9.27174	9.00654	10.6651	9.94257	0.00309837
ENSMUSG00000037572	Wdhd1	6.71141	6.91379	4.34905	3.15239	3.42398	3.11875	3.59183	0.0125659
ENSMUSG00000032400	Zwilch	4.50271	4.68917	3.9563	1.66358	1.61969	2.10356	2.46421	0.000470084
ENSMUSG00000019866	Aim1	2.4454	2.79919	2.46404	1.33629	1.41168	1.53007	1.6178	0.000277077
ENSMUSG00000035704	Alg8	8.10061	8.67409	7.02219	5.79261	6.47878	5.45613	5.40294	0.00771655
ENSMUSG00000054662	Ano9	3.91137	3.95389	3.30185	1.45506	1.47852	3.103	2.35421	0.0226379
ENSMUSG00000005470	Asf1b	8.63544	9.53412	6.76017	3.88593	2.68798	3.33053	5.52061	0.00643561
ENSMUSG00000047832	Cdca4	12.7559	12.1619	8.77619	7.96182	8.08844	8.28108	9.18594	0.0469548
ENSMUSG00000024791	Cdca5	4.32716	7.67201	3.27045	2.10435	1.19249	2.18826	1.64081	0.033997
ENSMUSG00000031262	Cenpi	3.45844	2.61865	2.31715	1.08764	0.717877	1.07007	1.77006	0.00821345
ENSMUSG00000023919	Cenpq	4.58891	3.45385	2.77918	2.07911	2.31547	2.62349	2.57651	0.0487314
ENSMUSG00000019813	Cep57l1	3.48382	4.97926	3.44748	2.98256	2.88885	2.90753	2.67049	0.0495121
ENSMUSG00000028633	Ctps	12.4376	11.2046	11.6751	8.68742	7.38405	9.4101	8.6931	0.00263267
ENSMUSG00000035842	Ddx11	1.66929	1.89671	1.3378	0.852335	0.867404	1.33787	1.19337	0.0337713
ENSMUSG00000027635	Dsn1	3.99015	3.83854	2.9695	2.18306	2.0582	2.65622	2.19533	0.00768538
ENSMUSG00000018983	E2f2	9.56926	11.8899	2.86378	1.25956	1.70834	1.38123	1.53942	0.0327498
ENSMUSG00000087060	Eldr	4.66339	6.06582	4.2584	2.48513	2.56807	3.44842	3.62743	0.019034
ENSMUSG00000039055	Eme1	1.712	1.56813	0.989771	0.610043	0.51234	0.464698	1.15129	0.0376847
ENSMUSG00000051220	Ercc6l	1.88238	1.14607	1.1771	0.754305	0.602557	0.468373	1.00725	0.0357319
ENSMUSG00000047757	Fancb	1.4587	1.41555	1.22943	0.932489	0.782806	1.15535	0.400689	0.0382206
ENSMUSG00000035455	Fignl1	5.85861	5.07842	4.2948	3.40371	2.16057	2.46626	3.99731	0.0214299
ENSMUSG00000055760	Gemin6	9.97177	12.5686	13.0397	6.48066	8.21595	9.35644	9.84675	0.0361721
ENSMUSG00000044783	Hjurp	36.1182	36.2257	29.1311	29.8908	24.1048	29.2504	24.9242	0.0493324
ENSMUSG00000025507	Pidd1	4.24899	6.36166	2.78109	2.24657	1.70795	2.084	1.72011	0.0355783
ENSMUSG00000023908	Pkmyt1	9.6514	12.7883	8.42095	6.34903	4.38363	6.50994	4.14655	0.0132871
ENSMUSG00000024640	Psat1	8.54175	7.80773	8.04618	4.96571	5.54925	4.91768	5.91361	0.000414015
ENSMUSG00000041238	Rbbp8	6.65058	4.96033	5.40095	3.77302	4.13315	4.24988	4.83239	0.0352506
ENSMUSG00000020649	Rrm2	26.2635	32.2396	9.75446	5.79439	5.07365	5.74703	6.20348	0.0291932
ENSMUSG00000074476	Spc24	10.3801	11.8843	10.3969	6.42913	3.67119	7.17106	7.5017	0.00828331
ENSMUSG00000046591	Ticrr	1.20234	1.22224	0.792219	0.451829	0.459759	0.367102	0.523761	0.00395673
ENSMUSG00000025574	Tk1	15.2648	22.2019	9.70782	6.88662	6.05999	6.80374	5.64795	0.0274825
ENSMUSG00000021569	Trip13	1.22805	2.00557	1.43649	0.895005	0.799158	1.02082	1.01132	0.0280222
ENSMUSG00000019845	Tube1	2.00428	2.26994	1.98844	1.59179	1.20319	1.45602	1.51568	0.00363211
ENSMUSG00000029591	Ung	4.33358	6.01723	3.79776	3.27039	2.93638	3.55378	3.12666	0.0497015
ENSMUSG00000073434	Wdr90	22.8046	25.4788	24.2557	18.4356	18.5485	20.5489	18.0233	0.00233778
ENSMUSG00000040204	2810417H13Rik	11.9372	14.2677	8.91407	6.022	5.27484	4.80375	7.09807	0.00896136
ENSMUSG00000030641	4632434I11Rik	1.77818	1.37894	1.37818	0.660539	0.885256	1.19892	1.17715	0.0371159
ENSMUSG00000037466	4930427A07Rik	5.77621	5.73207	4.41358	3.30193	1.93651	4.22921	2.3678	0.0213335
G2/M phase genes
ENSMUSG00000046295	Ankle1	4.53454	6.32802	2.91458	1.68128	0.809746	1.38045	0.533003	0.0107133
ENSMUSG00000036777	Anln	6.02442	5.12723	6.11074	4.6846	3.42248	4.59571	4.08334	0.0155099
ENSMUSG00000041219	Arhgap11a	8.11428	6.06528	6.95429	3.15311	2.25796	3.26008	2.16081	0.000809124
ENSMUSG00000025154	Arhgap19	4.50928	3.35036	3.17958	1.9962	1.55634	1.4083	2.39632	0.00850633
ENSMUSG00000033952	Aspm	3.0893	2.07611	2.03211	1.67348	0.816812	1.3095	1.18175	0.023083
ENSMUSG00000027496	Aurka	9.14488	10.203	8.41642	4.03982	2.89595	3.63939	3.39217	0.000102424
ENSMUSG00000020897	Aurkb	10.8337	12.6145	5.95605	3.87337	2.03239	3.50252	3.5583	0.0128725
ENSMUSG00000034773	BC030867	2.45732	1.77559	1.32768	0.953283	0.504724	1.18761	1.07945	0.0371402
ENSMUSG00000022070	Bora	4.18874	3.85411	3.68664	2.43991	2.30586	3.06124	2.27502	0.00259656
ENSMUSG00000027379	Bub1	4.44021	3.9921	3.65436	2.34911	1.40729	1.95758	1.62059	0.000857863
ENSMUSG00000040084	Bub1b	6.84817	5.34953	3.7061	3.04468	2.02264	2.39294	3.50773	0.0302583
ENSMUSG00000033031	C330027C09Rik	7.35478	5.00927	5.27344	3.86333	2.28701	4.35861	3.5204	0.0328807
ENSMUSG00000027326	Casc5	3.84183	2.29397	1.72902	1.22629	0.745098	0.733552	1.33656	0.0348104
ENSMUSG00000027715	Ccna2	24.1062	23.8996	17.3322	10.6447	6.29933	10.9464	9.63144	0.00267872
ENSMUSG00000041431	Ccnb1	12.7337	13.0456	10.2143	4.68623	2.57225	5.08989	3.40062	0.0005143
ENSMUSG00000032218	Ccnb2	14.9326	20.1158	12.2345	5.93887	3.60381	6.17085	5.61263	0.00385635
ENSMUSG00000072082	Ccnf	5.82835	6.39515	3.7176	2.39505	1.21982	2.07203	1.23995	0.00548003
ENSMUSG00000006398	Cdc20	14.3304	15.8923	13.0966	6.95268	4.48672	7.36685	6.28379	0.000472665
ENSMUSG00000027330	Cdc25b	15.5662	16.2977	10.1525	8.65158	6.98351	8.14868	7.74938	0.0146424
ENSMUSG00000044201	Cdc25c	2.11113	1.90415	1.43372	0.476526	0.598378	0.765422	1.02701	0.00403882
ENSMUSG00000048922	Cdca2	4.72654	3.93081	3.18397	2.09199	1.01784	2.02627	2.21742	0.00806514
ENSMUSG00000023505	Cdca3	16.6603	22.5807	10.292	8.41648	5.56603	8.45106	6.16718	0.029392
ENSMUSG00000028873	Cdca8	10.8386	16.7272	7.03596	3.90599	3.95882	5.29893	4.14107	0.0295761
ENSMUSG00000019942	Cdk1	23.23	30.324	22.8514	11.9492	7.10066	13.9344	11.6688	0.00297878
ENSMUSG00000037628	Cdkn3	3.2947	3.67476	1.77934	0.745216	0.387885	1.98971	1.26079	0.0352189
ENSMUSG00000029177	Cenpa	21.4376	29.5397	14.2616	11.1625	6.60382	9.22779	8.68092	0.0208413
ENSMUSG00000045328	Cenpe	2.97935	3.2169	2.84309	1.24982	0.794693	1.45402	1.47957	0.000375319
ENSMUSG00000026605	Cenpf	5.60993	3.67749	3.67561	2.49332	1.48737	1.9121	2.47875	0.0148053
ENSMUSG00000026708	Cenpl	4.02514	4.05554	3.26028	2.49401	1.27417	2.3914	2.60855	0.0135519
ENSMUSG00000031756	Cenpn	4.82341	6.13227	3.48618	2.36893	1.72399	2.44941	2.54497	0.0131488
ENSMUSG00000021391	Cenpp	3.27446	4.92975	3.81038	1.51995	1.16903	2.80942	0.991947	0.01322
ENSMUSG00000075266	Cenpw	3.80224	4.15898	2.40324	1.77555	0.93674	1.77396	1.98675	0.0174422
ENSMUSG00000024989	Cep55	2.24486	2.51455	1.90346	1.57537	1.15101	1.51388	1.42312	0.00731824
ENSMUSG00000073542	Cep76	6.63012	5.50963	5.27063	4.07191	4.007	3.42055	5.15695	0.031442
ENSMUSG00000029516	Cit	4.34555	4.20272	3.3129	2.43636	2.17936	2.28	2.42277	0.00214182
ENSMUSG00000037725	Ckap2	9.18092	8.19218	7.29277	4.1863	2.39656	4.23843	4.91601	0.00278319
ENSMUSG00000048327	Ckap2l	6.77884	6.45055	5.5156	3.05572	2.20237	2.42512	2.89086	0.000262366
ENSMUSG00000002297	Dbf4	6.97884	7.19984	4.44724	2.3462	1.59711	2.41619	2.85093	0.00455295
ENSMUSG00000021697	Depdc1b	2.16358	2.2629	1.94837	0.724834	0.5727	0.716786	1.42216	0.0031936
ENSMUSG00000037544	Dlgap5	6.27666	7.71945	5.99159	2.61777	2.42539	2.41449	2.04707	0.000263198
ENSMUSG00000027699	Ect2	7.2486	5.46833	7.39488	3.14251	2.16497	3.03264	4.63428	0.00744013
ENSMUSG00000058290	Espl1	3.35995	2.85484	2.21624	1.45418	1.05389	1.23864	0.923136	0.00313564
ENSMUSG00000035095	Fam167a	6.90754	5.07132	6.35327	3.87312	4.68001	3.44784	4.63633	0.0197237
ENSMUSG00000020808	Fam64a	8.33623	8.09524	6.3365	6.06153	2.12353	5.39801	4.14139	0.0407791
ENSMUSG00000027654	Fam83d	2.7404	2.24989	3.22961	1.43687	1.12598	1.27013	1.64407	0.00390061
ENSMUSG00000034023	Fancd2	2.90763	1.96885	2.15904	1.42065	0.891682	1.19066	1.95712	0.0410306
ENSMUSG00000001517	Foxm1	9.48924	9.46806	7.82745	4.74678	3.33924	4.7682	3.8175	0.000609208
ENSMUSG00000074802	Gas2l3	2.073	1.74616	2.00391	1.37679	0.82236	1.03525	1.04413	0.00275706
ENSMUSG00000085016	Gm11335	0.426182	0.876082	1.02551	0.241056	0.223423	0.467381	0.345952	0.0393182
ENSMUSG00000050107	Gsg2	1.98298	1.97159	1.19894	0.525784	0.423123	0.296729	0.712374	0.00375849
ENSMUSG00000022385	Gtse1	3.30989	3.80784	2.66741	1.22804	0.95229	1.20028	0.598042	0.000941744
ENSMUSG00000020330	Hmmr	7.0652	5.21507	5.95923	2.62023	1.73956	2.25905	3.10397	0.00131732
ENSMUSG00000024660	Incenp	7.37557	8.47962	5.88767	3.55908	2.56161	3.77457	3.57887	0.00273819
ENSMUSG00000028068	Iqgap3	4.62649	3.77993	3.82988	3.08286	1.5231	2.60613	2.29491	0.0128911
ENSMUSG00000012443	Kif11	10.2148	7.67923	7.22922	4.0852	2.29062	3.61617	3.77444	0.00286153
ENSMUSG00000041498	Kif14	1.6714	1.42865	1.15476	0.578134	0.299254	0.473185	0.705179	0.00247213
ENSMUSG00000036768	Kif15	4.90818	5.17962	3.16376	1.69991	1.61684	2.20916	1.99425	0.00588255
ENSMUSG00000027115	Kif18a	2.61554	2.22748	1.77762	0.825606	0.760597	0.803392	1.92125	0.0339279
ENSMUSG00000051378	Kif18b	3.36006	3.17374	2.57797	1.06096	0.902278	0.830434	1.97275	0.00415955
ENSMUSG00000003779	Kif20a	6.68521	7.50726	6.45241	3.47219	2.64432	3.72286	3.79595	0.000383164
ENSMUSG00000024795	Kif20b	3.45992	2.131	2.1036	1.50727	1.38113	1.47297	1.5249	0.0336147
ENSMUSG00000030677	Kif22	8.8691	11.1404	6.8035	3.84064	2.51525	4.91267	3.09613	0.00698422
ENSMUSG00000032254	Kif23	7.31025	8.15738	6.67674	3.91041	3.10905	4.18127	5.03833	0.00248356
ENSMUSG00000028678	Kif2c	2.54501	3.50864	2.90506	1.5676	0.796892	1.09339	1.51792	0.0028297
ENSMUSG00000034311	Kif4	3.674	3.5321	3.03221	1.47222	1.25025	1.4596	2.18097	0.00151027
ENSMUSG00000079553	Kifc1	9.40005	12.4735	8.16012	4.64792	2.57583	5.03227	4.09986	0.00512936
ENSMUSG00000027331	Knstrn	8.82745	15.6496	7.85637	4.97748	2.6808	6.33103	4.15273	0.0386979
ENSMUSG00000024590	Lmnb1	25.4695	28.282	20.0531	16.5377	13.8583	15.5922	17.0538	0.00985651
ENSMUSG00000029910	Mad2l1	12.9467	14.5666	10.4358	8.35199	6.2421	8.71024	8.30112	0.010934
ENSMUSG00000026779	Mastl	1.52389	1.11508	1.54979	0.857336	0.775696	1.0545	1.13518	0.0352811
ENSMUSG00000035683	Melk	4.9387	3.79931	4.29683	2.27355	1.48359	2.63263	1.9634	0.00240043
ENSMUSG00000047534	Mis18bp1	3.65145	2.5915	2.38349	1.93239	1.07429	1.36424	1.31368	0.0139391
ENSMUSG00000031004	Mki67	22.1106	20.8369	9.99778	5.84345	3.83411	4.67186	6.30727	0.0125952
ENSMUSG00000021485	Mxd3	7.40082	11.6648	6.28665	4.12352	2.46563	5.03825	3.59772	0.0276781
ENSMUSG00000038252	Ncapd2	22.7562	20.2133	18.389	13.2848	11.5241	12.689	11.2774	0.000991504
ENSMUSG00000015880	Ncapg	7.42437	6.56485	3.96406	1.70045	1.56328	2.16528	2.85112	0.00862713
ENSMUSG00000034906	Ncaph	8.08457	7.0553	5.8239	4.44709	2.45844	3.36079	4.66488	0.0104216
ENSMUSG00000024056	Ndc80	4.90026	5.04975	4.36716	1.85309	1.4333	1.99411	1.87189	4.43133e-05
ENSMUSG00000039396	Neil3	6.80717	8.02385	5.60177	3.37595	1.2586	3.35468	2.00169	0.00388973
ENSMUSG00000026622	Nek2	7.00894	7.32108	6.98841	3.33977	1.92853	3.43206	2.53135	0.000173077
ENSMUSG00000026683	Nuf2	7.47599	7.87339	4.43226	3.62849	1.65185	3.32831	3.36062	0.0189568
ENSMUSG00000027306	Nusap1	9.51084	9.78195	5.98808	3.92142	3.5043	3.97241	4.31761	0.00757034
ENSMUSG00000035365	Parpbp	2.24156	1.40909	1.5249	1.21633	0.517325	0.466479	0.841374	0.0233047
ENSMUSG00000022033	Pbk	24.9485	20.3961	23.6192	9.77689	5.63593	10.7834	7.95875	0.000426629
ENSMUSG00000041064	Pif1	2.3442	2.38853	2.22174	1.17682	0.278152	1.13968	0.631899	0.00207088
ENSMUSG00000030867	Plk1	9.07669	12.1558	6.73128	4.07728	2.00716	3.8121	3.71295	0.00894436
ENSMUSG00000038943	Prc1	18.212	14.3646	15.4835	8.36777	6.29194	9.0853	9.54397	0.00182383
ENSMUSG00000020493	Prr11	3.43703	2.97049	2.83766	1.77484	1.22943	1.69462	2.11591	0.00342013
ENSMUSG00000023015	Racgap1	19.0133	18.3946	17.985	9.65711	6.76667	10.0466	9.166	0.000132811
ENSMUSG00000026955	Sapcd2	4.53148	6.40186	5.3575	2.34457	1.45574	3.74822	2.11385	0.0090185
ENSMUSG00000023940	Sgol1	2.69459	2.41589	1.99363	1.17231	0.691547	1.23242	2.17647	0.0487677
ENSMUSG00000022322	Shcbp1	5.51934	3.93576	5.00741	2.4704	1.15427	2.13588	2.39366	0.0033345
ENSMUSG00000021965	Ska3	2.26637	2.64945	2.41687	1.49314	0.859634	1.43965	1.94517	0.0153154
ENSMUSG00000002055	Spag5	6.41911	7.41926	3.88913	2.91794	1.3843	2.66216	3.779	0.0283786
ENSMUSG00000069910	Spdl1	2.38256	1.85329	1.67256	1.29769	0.857038	1.14097	1.28979	0.0124674
ENSMUSG00000037313	Tacc3	12.3737	15.8883	9.56918	6.64598	5.73037	7.41379	7.15783	0.0141337
ENSMUSG00000020914	Top2a	31.0167	25.9837	22.7549	14.6329	10.4909	13.0876	11.6444	0.00158251
ENSMUSG00000027469	Tpx2	10.5585	11.1832	8.26124	4.70633	2.90355	4.01479	5.84265	0.00291664
ENSMUSG00000034317	Trim59	14.0402	11.9828	7.14239	5.61667	4.04259	4.63881	7.48614	0.0334841
ENSMUSG00000032783	Troap	2.9108	3.80945	2.33386	1.39343	0.716651	1.20681	0.81843	0.00451965
ENSMUSG00000038379	Ttk	3.99477	2.28739	2.84997	1.5139	0.941363	1.55871	2.14632	0.032209
ENSMUSG00000001403	Ube2c	27.2759	49.7393	20.1767	10.1211	6.06704	10.7154	8.51812	0.0263718
ENSMUSG00000037020	Wdr62	3.5667	4.30356	2.08375	1.55147	1.07565	1.50092	1.34257	0.0176798
ENSMUSG00000098090	2700099C18Rik	3.39876	5.4261	3.16956	1.74771	1.24651	1.87537	1.26058	0.0112698
ENSMUSG00000028044	Cks1b	26.0819	38.2128	25.9955	19.0137	14.129	24.1707	18.9212	0.0456952
ENSMUSG00000022021	Diap3	3.04309	2.54279	2.23821	1.73589	0.64971	1.27718	1.36704	0.00957496
ENSMUSG00000027635	Dsn1	3.99015	3.83854	2.9695	2.18306	2.0582	2.65622	2.19533	0.00768538
ENSMUSG00000087060	Eldr	4.66339	6.06582	4.2584	2.48513	2.56807	3.44842	3.62743	0.019034
ENSMUSG00000039055	Eme1	1.712	1.56813	0.989771	0.610043	0.51234	0.464698	1.15129	0.0376847
ENSMUSG00000051220	Ercc6l	1.88238	1.14607	1.1771	0.754305	0.602557	0.468373	1.00725	0.0357319
ENSMUSG00000035455	Fignl1	5.85861	5.07842	4.2948	3.40371	2.16057	2.46626	3.99731	0.0214299
ENSMUSG00000044783	Hjurp	36.1182	36.2257	29.1311	29.8908	24.1048	29.2504	24.9242	0.0493324
ENSMUSG00000054717	Hmgb2	53.6976	62.8826	29.353	22.8322	20.3476	27.1368	24.4577	0.0329212
ENSMUSG00000018362	Kpna2	49.9117	45.5871	47.907	23.4722	19.8304	21.3668	21.9591	7.38011e-06
ENSMUSG00000041238	Rbbp8	6.65058	4.96033	5.40095	3.77302	4.13315	4.24988	4.83239	0.0352506
ENSMUSG00000020649	Rrm2	26.2635	32.2396	9.75446	5.79439	5.07365	5.74703	6.20348	0.0291932
ENSMUSG00000074476	Spc24	10.3801	11.8843	10.3969	6.42913	3.67119	7.17106	7.5017	0.00828331
ENSMUSG00000025574	Tk1	15.2648	22.2019	9.70782	6.88662	6.05999	6.80374	5.64795	0.0274825
ENSMUSG00000021569	Trip13	1.22805	2.00557	1.43649	0.895005	0.799158	1.02082	1.01132	0.0280222
ENSMUSG00000036752	Tubb4b	103.69	128.115	107.624	98.5943	98.0284	91.2283	95.0224	0.046923
ENSMUSG00000040204	2810417H13Rik	11.9372	14.2677	8.91407	6.022	5.27484	4.80375	7.09807	0.00896136
ENSMUSG00000030641	4632434I11Rik	1.77818	1.37894	1.37818	0.660539	0.885256	1.19892	1.17715	0.0371159
ENSMUSG00000037466	4930427A07Rik	5.77621	5.73207	4.41358	3.30193	1.93651	4.22921	2.3678	0.0213335
ENSMUSG00000054662	Ano9	3.91137	3.95389	3.30185	1.45506	1.47852	3.103	2.35421	0.0226379
ENSMUSG00000005470	Asf1b	8.63544	9.53412	6.76017	3.88593	2.68798	3.33053	5.52061	0.00643561
ENSMUSG00000024791	Cdca5	4.32716	7.67201	3.27045	2.10435	1.19249	2.18826	1.64081	0.033997
